# Supplementary material for: Cannabidiol Promotes Neuronal Differentiation Using Akt and Erk Pathways Triggered by Cb1 Signaling
Source: MDPI journal article supplement (doi:10.3390/molecules27175644), 2022-09-01
Supplement: s1 [file s1]

## Western blot membranes of p-AKT/AKT and CB1/GAPDH

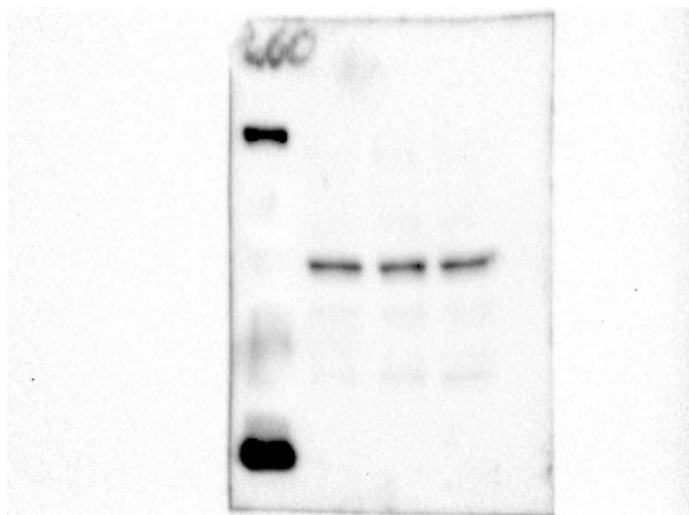

Membrane for p-AKT

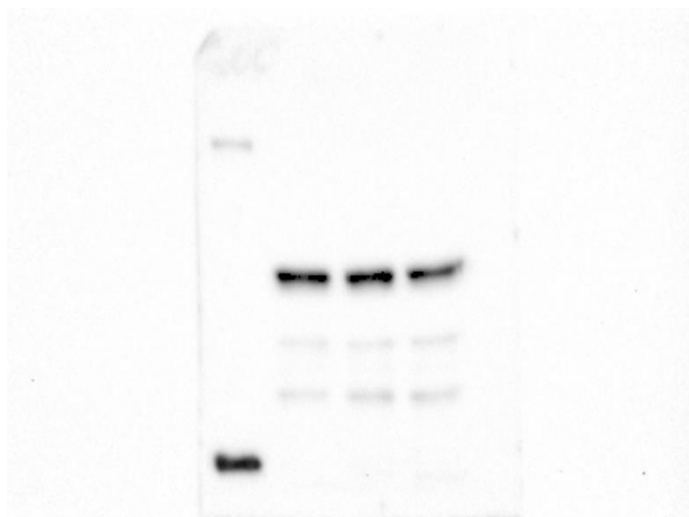

Membrane for AKT

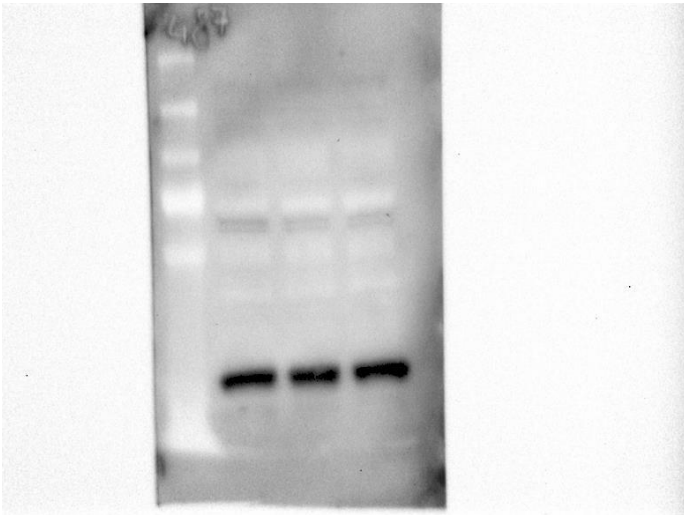

Membrane for CB1

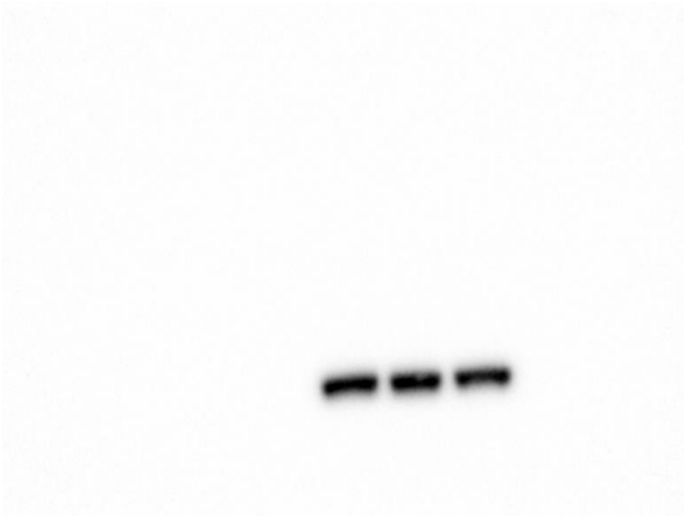

Membrane for GAPDH
